# Supplementary figures and images for: The Clinical Outcome of Early Periprosthetic Joint Infections Caused by Staphylococcus epidermidis and Managed by Surgical Debridement in an Era of Increasing Resistance
Source: MDPI journal article supplement (doi:10.3390/antibiotics12010040), 2022-12-27

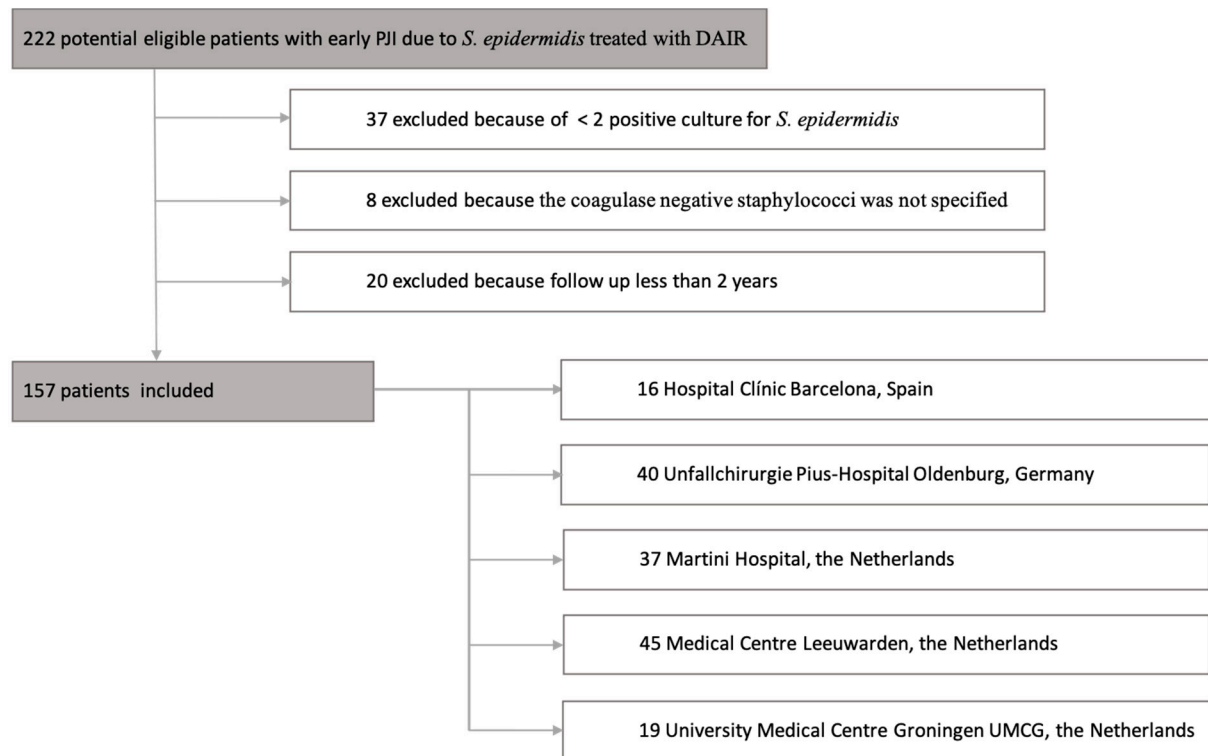

Figure S1. Flow chart patient inclusion.

Supplement: s1 [file s1]
